# Supplementary material for: Combining Whole-Genome Sequencing and Multimodel Phenotyping To Identify Genetic Predictors of Salmonella Virulence
Source: PubMed Central journal article supplement (PMC7289705; doi:10.1128/msphere.00293-20), 2020-06-10

Figure S2

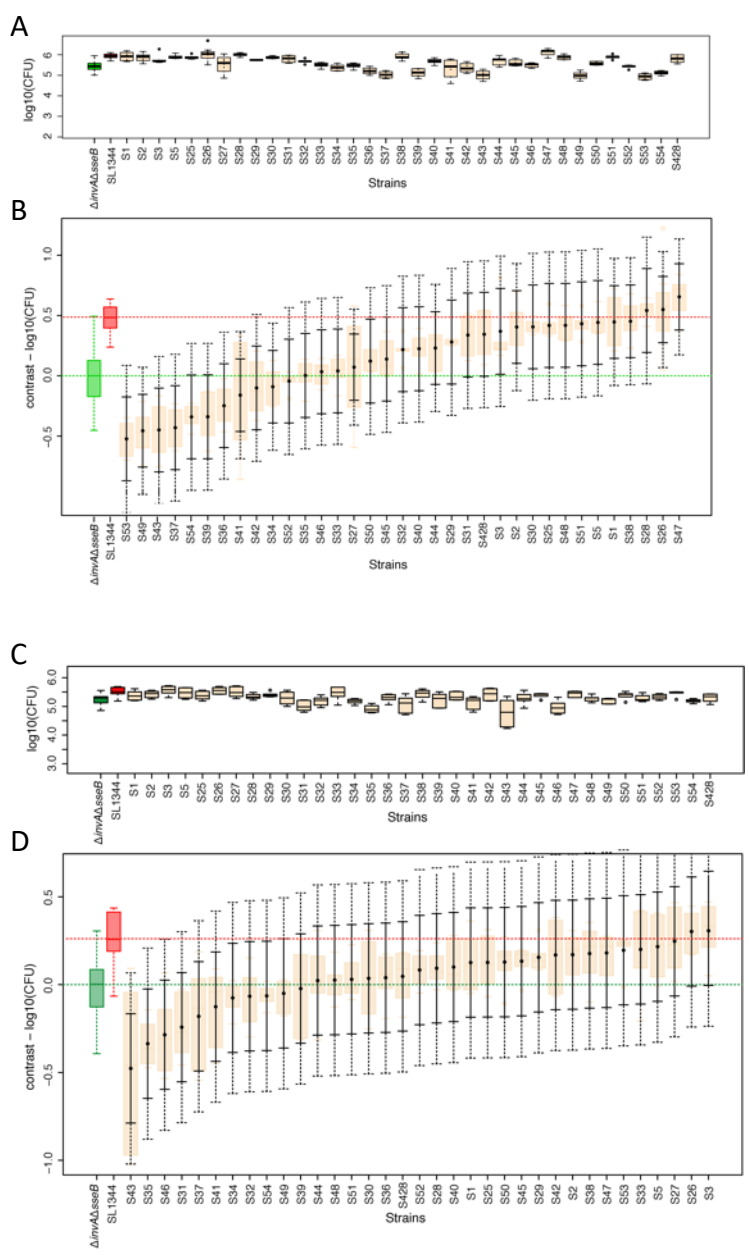

Supplement: mSphere.00293-20-sf002.pdf [file mSphere.00293-20-sf002.pdf]
